# Supplementary material
Source: PubMed Central journal article supplement (PMC2570853)
Supplement: NIHMS60313-supplement-SI1.pdf [file NIHMS60313-supplement-SI1.pdf]

# Supporting Information

*for*

## X-ray Absorption Spectroscopic and Theoretical Studies on (L)[Cu<sub>2</sub>(S<sub>2</sub>)<sub>n</sub>]<sup>2+</sup> Complexes: Disulfide Versus Disulfide(•1-) Bonding

*Ritimukta Sarangi<sup>†</sup>, John T. York<sup>‡</sup>, Matthew E. Helton,<sup>||</sup> Kiyoshi Fujisawa,<sup>⊥</sup> Kenneth D. Karlin,<sup>||</sup> William  
B. Tolman,<sup>‡</sup> Britt Hedman,<sup>\*,§</sup> Keith O. Hodgson,<sup>\*,†,§</sup> Edward I. Solomon<sup>\*,†</sup>*

<sup>†</sup>Department of Chemistry, Stanford University, Stanford, CA 94305,

<sup>§</sup>Stanford Synchrotron Radiation Laboratory, Stanford Linear Accelerator Center, Stanford University,  
Stanford, CA 94309,

<sup>‡</sup>Department of Chemistry, Center for Metals in Biocatalysis and Supercomputer Institute, University of  
Minnesota, 207 Pleasant Street SE, Minneapolis, Minnesota 55455

<sup>||</sup>Department of Chemistry, The Johns Hopkins University, Baltimore, MD 21218

<sup>⊥</sup>Department of Chemistry, Graduate School of Pure and Applied Sciences, University of Tsukuba,  
Tsukuba 305-8571, Japan

\* To whom correspondence should be addressed

Fax: (650) 725-0259, email: [edward.solomon@stanford.edu](mailto:edward.solomon@stanford.edu); Fax: (612) 625-5780,

### RECEIVED DATE

Keywords: XAS, Cu K-edge, Cu L-edge S K-edge, Disulfide, Cu-S bonding

Title Running Head: X-ray Absorption Spectroscopy of [Cu<sub>2</sub>S<sub>n</sub>]<sup>2+</sup> systems

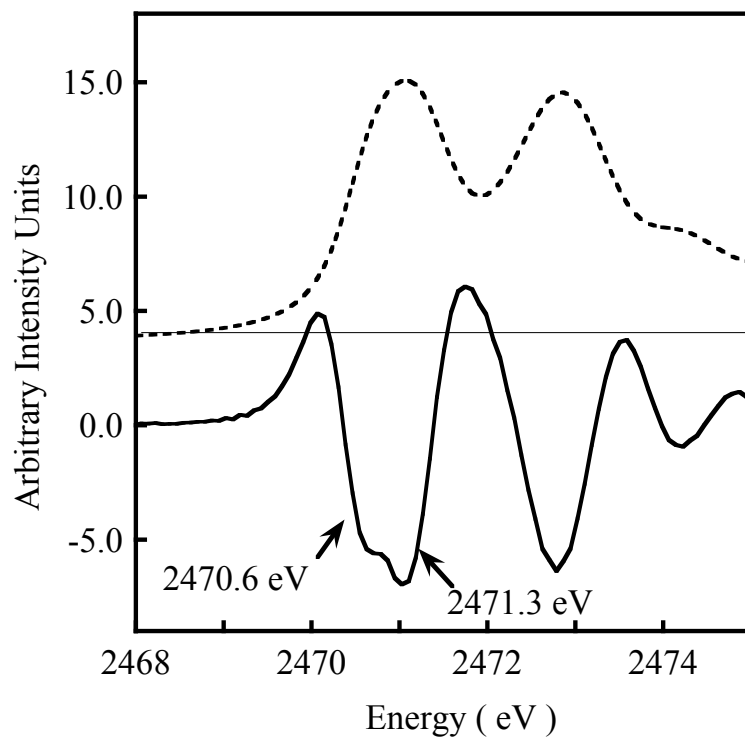

**Figure S1.** The S K-edge XAS data for **3** (-----) and the corresponding second derivative spectrum (—). The second derivative clearly shows the presence of two peaks in the pre-edge region.

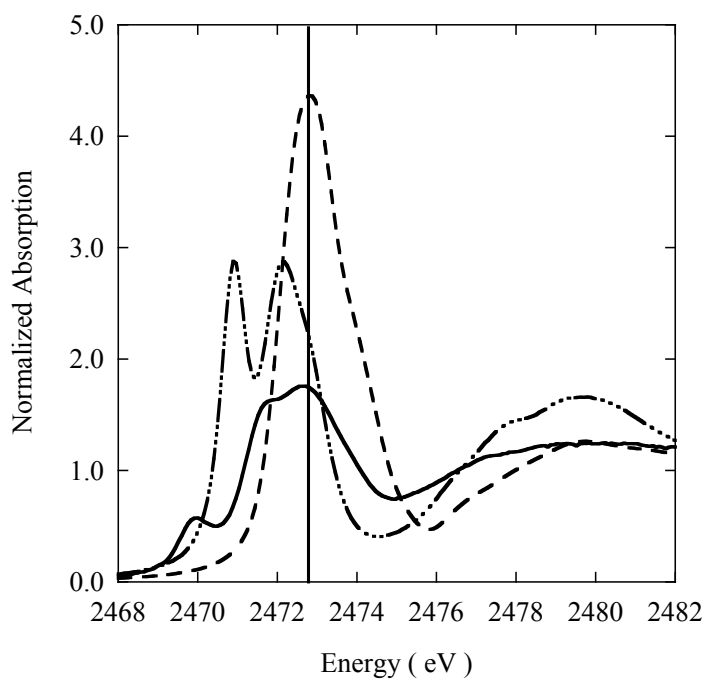

**Figure S3.** Comparison of the S K-edge XAS spectrum of **1** (—), **2** (—••) and S<sub>8</sub> (---). Note that the intense low energy transition (2472.8 eV) in the S K-edge spectrum S<sub>8</sub> is separated by more than 1.5 eV relative to the pre-edge feature observed in both **1** and **2**. Thus, a fractional subtraction of the S<sub>8</sub> spectrum from the spectra of **1** and **2** was performed. DFT calculation indicate that there is no other low-lying orbital containing significant amount of S character which can contribute to the S K-edge spectrum of **1** and **2** in the 2472-2476 eV region. This allows for the quantitative subtraction of the S<sub>8</sub> spectrum from that of **1** and **2**.

**Table S1.** Cu character in the  $\psi_{LUMO}^*$  obtained from *EDG\_FIT* and the total orbital covalency (TOC) method.

|                                                    | <i>EDG_FIT</i> <sup>c,d</sup> | Total Area | TOC Method<br>Covalency <sup>e</sup> |
|----------------------------------------------------|-------------------------------|------------|--------------------------------------|
| D <sub>4h</sub> [CuCl <sub>4</sub> ] <sup>2-</sup> | 61.0%                         | 10.1       | 61%                                  |
| <b>1</b>                                           | 63.2%                         | 10.3       | 62.2%                                |
| <b>2</b>                                           | 37.4%                         | 6.4        | 38.7%                                |
| <b>3</b>                                           | 22.3%                         | 7.9        | 23.9%                                |

<sup>c</sup>Error in total intensity due to data processing and fitting is  $\pm 5\%$ . <sup>d</sup>Error in estimation of total intensity is 8% (see Experimental Section). <sup>e</sup>Error in estimation of total intensity is 8-10%.

**Table S2.** First shell bond distances and bond angles for **1**, **2** and **3**.

|          | Cu-S | Cu-N <sub>eq</sub> | Cu-N <sub>ax</sub> (O <sub>ax</sub> ) | SCuS (°) | SCuN (°) | Cu-D (Å) |
|----------|------|--------------------|---------------------------------------|----------|----------|----------|
| <b>1</b> | 2.28 | 2.08 <sup>b</sup>  | 2.09                                  | -        | -        | -        |
| <b>2</b> | 2.26 | 2.02               | 2.22                                  | 54.5     | 104      | 0.3      |
| <b>3</b> | 2.27 | 2.04               | 2.30                                  | 74       | 98       | 0.17     |

<sup>a</sup>The distance between the SSNN plane (D) and the Cu atom. <sup>b</sup>The average Cu-N bond distance

The geometry-optimized xyz coordinates of **1**, **2**, **3** and **3<sup>Red</sup>**.

**1** [ $\{(\text{TMPA})\text{Cu}\}_2\text{S}_2$ ]<sup>2+</sup>

|    |           |           |           |
|----|-----------|-----------|-----------|
| Cu | -2.661831 | 0.209200  | -0.939916 |
| Cu | 2.661831  | -0.209200 | 0.939916  |
| S  | -0.378097 | 0.162972  | -0.943531 |
| S  | 0.378097  | -0.162972 | 0.943531  |
| N  | -4.775103 | 0.266294  | -1.119652 |
| N  | -2.759196 | 0.737103  | -2.885765 |
| C  | -1.786393 | 1.284023  | -3.655926 |
| C  | -1.999586 | 1.671504  | -4.983580 |
| C  | -3.273115 | 1.498865  | -5.544246 |
| C  | -4.288181 | 0.940377  | -4.752141 |
| C  | -3.997444 | 0.564579  | -3.434844 |
| H  | -0.811732 | 1.412283  | -3.170724 |
| H  | -1.178586 | 2.106830  | -5.560399 |
| H  | -3.477292 | 1.798573  | -6.576969 |
| H  | -5.297163 | 0.793329  | -5.150683 |
| C  | -5.017678 | -0.107152 | -2.533215 |
| H  | -4.897429 | -1.205479 | -2.603975 |
| H  | -6.052067 | 0.127481  | -2.856547 |
| N  | -3.116990 | 1.681466  | 0.509639  |
| C  | -2.342126 | 2.132519  | 1.522656  |
| C  | -2.787459 | 3.085513  | 2.448581  |
| C  | -4.089864 | 3.590090  | 2.327105  |
| C  | -4.901906 | 3.121703  | 1.282429  |
| C  | -4.379888 | 2.174858  | 0.390664  |
| H  | -1.335847 | 1.695444  | 1.585029  |
| H  | -2.123172 | 3.417206  | 3.251964  |
| H  | -4.473668 | 4.330025  | 3.036818  |
| H  | -5.926943 | 3.486865  | 1.159719  |
| C  | -5.167677 | 1.662185  | -0.804918 |
| H  | -6.259078 | 1.755085  | -0.634059 |
| H  | -4.926631 | 2.279702  | -1.690921 |
| N  | -3.075035 | -1.647260 | -0.143960 |
| C  | -2.191552 | -2.650077 | 0.076039  |
| C  | -2.590766 | -3.945336 | 0.428137  |
| C  | -3.959931 | -4.224163 | 0.543994  |
| C  | -4.881139 | -3.189021 | 0.321605  |
| C  | -4.404044 | -1.913745 | -0.008956 |
| H  | -1.135995 | -2.376212 | -0.025026 |
| H  | -1.837495 | -4.720004 | 0.598549  |
| H  | -4.308504 | -5.229055 | 0.802923  |
| H  | -5.958222 | -3.365922 | 0.408545  |
| C  | -5.327710 | -0.716387 | -0.156368 |
| H  | -6.353938 | -1.030313 | -0.433094 |
| H  | -5.400107 | -0.208101 | 0.823373  |
| N  | 4.775103  | -0.266294 | 1.119652  |

|   |          |           |           |
|---|----------|-----------|-----------|
| N | 2.759196 | -0.737103 | 2.885765  |
| C | 1.786393 | -1.284023 | 3.655926  |
| C | 1.999586 | -1.671504 | 4.983580  |
| C | 3.273115 | -1.498865 | 5.544246  |
| C | 4.288181 | -0.940377 | 4.752141  |
| C | 3.997444 | -0.564579 | 3.434844  |
| H | 0.811732 | -1.412283 | 3.170724  |
| H | 1.178586 | -2.106830 | 5.560399  |
| H | 3.477292 | -1.798573 | 6.576969  |
| H | 5.297163 | -0.793329 | 5.150683  |
| C | 5.017678 | 0.107152  | 2.533215  |
| H | 4.897429 | 1.205479  | 2.603975  |
| H | 6.052067 | -0.127481 | 2.856547  |
| N | 3.075035 | 1.647260  | 0.143960  |
| C | 2.191552 | 2.650077  | -0.076039 |
| C | 2.590766 | 3.945336  | -0.428137 |
| C | 3.959931 | 4.224163  | -0.543994 |
| C | 4.881139 | 3.189021  | -0.321605 |
| C | 4.404044 | 1.913745  | 0.008956  |
| H | 1.135995 | 2.376212  | 0.025026  |
| H | 1.837495 | 4.720004  | -0.598549 |
| H | 4.308504 | 5.229055  | -0.802923 |
| H | 5.958222 | 3.365922  | -0.408545 |
| C | 5.327710 | 0.716387  | 0.156368  |
| H | 6.353938 | 1.030313  | 0.433094  |
| H | 5.400107 | 0.208101  | -0.823373 |
| N | 3.116990 | -1.681466 | -0.509639 |
| C | 2.342126 | -2.132519 | -1.522656 |
| C | 2.787459 | -3.085513 | -2.448581 |
| C | 4.089864 | -3.590090 | -2.327105 |
| C | 4.901906 | -3.121703 | -1.282429 |
| C | 4.379888 | -2.174858 | -0.390664 |
| H | 1.335847 | -1.695444 | -1.585029 |
| H | 2.123172 | -3.417206 | -3.251964 |
| H | 4.473668 | -4.330025 | -3.036818 |
| H | 5.926943 | -3.486865 | -1.159719 |
| C | 5.167677 | -1.662185 | 0.804918  |
| H | 6.259078 | -1.755085 | 0.634059  |
| H | 4.926631 | -2.279702 | 1.690921  |

**2 [(TPB)Cu]<sub>2</sub>S<sub>2</sub>]<sup>2+</sup>**

|    |           |           |           |
|----|-----------|-----------|-----------|
| Cu | 1.859864  | 0.000646  | 0.326781  |
| Cu | -1.859852 | -0.000706 | -0.326978 |
| S  | -0.000510 | 1.150918  | 0.000443  |
| S  | 0.000554  | -1.150959 | -0.001012 |
| H  | -4.351740 | -4.179498 | -2.210584 |
| H  | -4.206552 | 0.008763  | 4.797792  |
| H  | -4.351577 | 4.171379  | -2.226111 |
| H  | 4.206994  | -0.009799 | -4.797827 |

|   |           |           |           |
|---|-----------|-----------|-----------|
| H | 4.351432  | 4.179166  | 2.211497  |
| H | 4.351782  | -4.171113 | 2.226443  |
| N | 2.985865  | -0.001482 | -1.701533 |
| N | 4.341381  | -0.001989 | -1.511534 |
| N | 3.040477  | 1.432622  | 0.907422  |
| N | 4.378252  | 1.261081  | 0.683498  |
| N | 3.040528  | -1.430271 | 0.910711  |
| N | 4.378358  | -1.259094 | 0.686925  |
| H | -6.111460 | 0.000168  | 0.081095  |
| H | 6.111353  | 0.000063  | -0.080985 |
| H | 1.782442  | -0.004662 | -3.430467 |
| C | 2.798641  | -0.004639 | -3.033357 |
| C | 4.034090  | -0.006930 | -3.722535 |
| C | 4.993835  | -0.005082 | -2.710847 |
| H | 6.082922  | -0.005724 | -2.750674 |
| H | 1.887594  | 2.949181  | 1.823887  |
| C | 2.885797  | 2.614454  | 1.541009  |
| C | 4.139968  | 3.225622  | 1.731311  |
| C | 5.057507  | 2.332177  | 1.172350  |
| H | 6.142214  | 2.376980  | 1.085395  |
| H | 1.887730  | -2.943340 | 1.832998  |
| C | 2.885985  | -2.609387 | 1.549386  |
| C | 4.140294  | -3.219266 | 1.742914  |
| C | 5.057788  | -2.327809 | 1.180688  |
| H | 6.142590  | -2.372430 | 1.094829  |
| B | 4.900046  | -0.000029 | -0.075592 |
| N | -2.985698 | 0.001946  | 1.701368  |
| N | -3.040683 | -1.432680 | -0.907135 |
| N | -3.040717 | 1.430136  | -0.910800 |
| N | -4.341203 | 0.002193  | 1.511522  |
| C | -2.798348 | 0.004609  | 3.033214  |
| N | -4.378466 | -1.261055 | -0.683312 |
| C | -2.886035 | -2.614642 | -1.540583 |
| N | -4.378586 | 1.259185  | -0.686951 |
| C | -2.885971 | 2.609337  | -1.549274 |
| C | -4.993562 | 0.004902  | 2.710859  |
| B | -4.900150 | 0.000247  | 0.075587  |
| H | -1.782097 | 0.004821  | 3.430189  |
| C | -4.033709 | 0.006547  | 3.722488  |
| C | -5.057734 | -2.332145 | -1.172040 |
| H | -1.887794 | -2.949348 | -1.823359 |
| C | -4.140185 | -3.225804 | -1.730736 |
| C | -5.057802 | 2.328146  | -1.180450 |
| H | -1.887637 | 2.943139  | -1.832796 |
| C | -4.140163 | 3.219521  | -1.742570 |
| H | -6.082642 | 0.005586  | 2.750832  |
| H | -6.142445 | -2.377012 | -1.085174 |
| H | -6.142570 | 2.373143  | -1.094343 |

3 [{(TMEDA)Cu}<sub>2</sub>(S<sub>2</sub>)<sub>2</sub>](OTf)<sub>2</sub> (This structure includes the triflate counterions)

|    |           |           |           |
|----|-----------|-----------|-----------|
| C  | 3.196785  | -3.631542 | -0.647446 |
| C  | -6.077260 | -1.004476 | 0.276795  |
| C  | 6.077197  | 1.003688  | -0.276654 |
| C  | -3.196555 | 3.631647  | 0.646829  |
| C  | 2.574745  | -3.971901 | 0.638407  |
| C  | -2.574640 | 3.971829  | -0.638475 |
| H  | 2.916594  | -2.334633 | -2.158483 |
| H  | -2.916962 | 2.334166  | 2.158753  |
| H  | 1.530626  | -3.078099 | -1.796107 |
| H  | -1.531752 | 3.077317  | 1.796051  |
| H  | 1.430755  | -2.948695 | 1.995915  |
| H  | -1.430927 | 2.948678  | -1.994708 |
| H  | 2.974797  | -2.465950 | 2.028504  |
| H  | -2.975651 | 2.465735  | -2.028894 |
| Cu | -1.873738 | 1.298739  | -0.007721 |
| Cu | 1.873672  | -1.299383 | 0.007864  |
| F  | 6.095853  | 0.751552  | -1.590562 |
| F  | -6.095708 | -0.751347 | 1.590496  |
| F  | 6.914334  | 0.136189  | 0.303851  |
| F  | -6.914467 | -0.137094 | -0.303726 |
| F  | 6.572349  | 2.230764  | -0.078621 |
| F  | -6.572543 | -2.231689 | 0.079693  |
| N  | 2.359804  | -2.680182 | -1.403033 |
| N  | -2.360857 | 2.679977  | 1.402906  |
| N  | 2.227866  | -2.748445 | 1.426547  |
| N  | -2.229065 | 2.747954  | -1.426446 |
| O  | 3.691448  | 1.881035  | -0.245503 |
| O  | -3.691649 | -1.881548 | 0.246579  |
| O  | 4.603428  | 1.018636  | 1.808057  |
| O  | -4.603006 | -1.018383 | -1.807227 |
| O  | 4.032509  | -0.492384 | 0.002688  |
| O  | -4.032251 | 0.492399  | -0.002972 |
| S  | 0.946646  | 0.246398  | -1.370661 |
| S  | -0.946381 | -0.246460 | 1.370393  |
| S  | -0.937023 | -0.262429 | -1.366546 |
| S  | 0.936878  | 0.262006  | 1.367668  |
| S  | 4.414444  | 0.843865  | 0.405891  |
| S  | -4.415155 | -0.846004 | -0.406381 |
| H  | -3.113170 | 4.527218  | 1.083899  |
| H  | -4.159927 | 3.363772  | 0.634608  |
| H  | -3.251720 | 4.573324  | -1.062431 |
| H  | -1.773017 | 4.567155  | -0.585033 |
| H  | 3.121180  | -4.568748 | -0.988041 |
| H  | 1.731489  | -4.489066 | 0.492327  |
| H  | 4.156468  | -3.352276 | -0.615413 |
| H  | 3.314548  | -4.533269 | 1.009389  |



**3<sup>Red</sup>** [ {(TMEDA)Cu}<sub>2</sub>(S<sub>2</sub>)<sub>2</sub> ]<sup>0</sup>

|    |           |           |           |
|----|-----------|-----------|-----------|
| Cu | -1.666007 | 0.034614  | 0.763735  |
| Cu | 1.665927  | -0.034570 | -0.763713 |
| C  | 4.395257  | -0.553692 | 0.323466  |
| C  | -4.395067 | 0.553653  | -0.324112 |
| C  | 3.931890  | 0.756671  | 0.947012  |
| C  | -3.931686 | -0.756969 | -0.947103 |
| H  | 3.446650  | -2.042794 | -0.755380 |
| H  | -3.446535 | 2.043007  | 0.754463  |
| H  | 2.761207  | -1.752313 | 0.684563  |
| H  | -2.760821 | 1.751999  | -0.685259 |
| H  | 2.414326  | 2.077019  | 0.502814  |
| H  | -2.414380 | -2.077335 | -0.502137 |
| H  | 3.535105  | 1.955808  | -0.683464 |
| H  | -3.535385 | -1.955585 | 0.683875  |
| N  | 3.218455  | -1.301202 | -0.104556 |
| N  | -3.218288 | 1.301192  | 0.103912  |
| N  | 3.032024  | 1.429857  | 0.021714  |
| N  | -3.032087 | -1.429932 | -0.021373 |
| S  | 0.215827  | -1.809637 | -0.787349 |
| S  | -0.215923 | 1.809625  | 0.787618  |
| S  | -0.102603 | -1.523546 | 1.220491  |
| S  | 0.102577  | 1.523709  | -1.220247 |
| H  | -5.026257 | 1.104261  | -1.030822 |
| H  | -5.001763 | 0.344141  | 0.561808  |
| H  | -4.797888 | -1.362623 | -1.237604 |
| H  | -3.363133 | -0.540733 | -1.855681 |
| H  | 5.026659  | -1.104487 | 1.029841  |
| H  | 3.363567  | 0.540069  | 1.855648  |
| H  | 5.001730  | -0.343813 | -0.562520 |
| H  | 4.798103  | 1.362303  | 1.237527  |

Complete Reference 21:

Frisch, M. J.; Trucks, G. W.; Schlegel, H. B.; Scuseria, G. E.; Robb, M. A.; Cheeseman, J. R.; Montgomery, J., J. A.; Vreven, T.; Kudin, K. N.; Burant, J. C.; Millam, J. M.; Iyengar, S. S.; Tomasi, J.; Barone, V.; Mennucci, B.; Cossi, M.; Scalmani, G.; Rega, N.; Petersson, G. A.; Nakatsuji, H.; Hada, M.; Ehara, M.; Toyota, K.; Fukuda, R.; Hasegawa, J.; Ishida, M.; Nakajima, T.; Honda, Y.; Kitao, O.; Nakai, H.; Klene, M.; Li, X.; Knox, J. E.; Hratchian, H. P.; Cross, J. B.; Bakken, V.; Adamo, C.; Jaramillo, J.; Gomperts, R.; Stratmann, R. E.; Yazyev, O.; Austin, A. J.; Cammi, R.; Pomelli, C.; Ochterski, J. W.; Ayala, P. Y.; Morokuma, K.; Voth, G. A.; Salvador, P.; Dannenberg, J. J.; Zakrzewski, V. G.; Dapprich, S.; Daniels, A. D.; Strain, M. C.; Farkas, O.; Malick, D. K.; Rabuck, A. D.; Raghavachari, K.; Foresman, J. B.; Ortiz, J. V.; Cui, Q.; Baboul, A. G.; Clifford, S.; Cioslowski, J.; Stefanov, B. B.; Liu, G.; Liashenko, A.; Piskorz, P.; Komaromi, I.; Martin, R. L.; Fox, D. J.; Keith, T.; Al-Laham, M. A.; Peng, C. Y.; Nanayakkara, A.; Challacombe, M.; Gill, P. M. W.; Johnson, B.; Chen, W.; Wong, M. W.; Gonzalez, C.; Pople, J. A. *Gaussian 03, revision C.02*, 2004,
